# Supplementary material for: Azobenzene-based solar thermal energy storage enhanced by gold nanoparticles for rapid, optically-triggered heat release at room temperature
Source: Royal Society of Chemistry journal article supplement (doi:10.1039/d0ta06913b), 2020-01-01
Supplement: d0ta06913b1.pdf [file d0ta06913b1.pdf]

**Supporting Information for:**

**Azobenzene-based solar thermal energy storage enhanced by gold nanoparticles for rapid, optically-triggered heat release at room temperature**

**Liqi Dong, Yuanhao Chen, Fei Zhai, Lin Tang, Wenchao Gao, Junwen Tang, Yiyu Feng, Wei Feng\***

School of Materials Science and Engineering, Tianjin University, Tianjin 300072, China

**Corresponding author: Wei Feng**

\*E-mail: weifeng@tju.edu.cn

Fax: +86-22-27404824

## **Table of Contents**

|                                                                                                                                                  |      |
|--------------------------------------------------------------------------------------------------------------------------------------------------|------|
| 1. $^1\text{H}$ NMR spectrum of <i>compound 1</i> (Figure S1).....                                                                               | S-3  |
| 2. $^{13}\text{C}$ NMR spectrum of <i>compound 1</i> (Figure S2).....                                                                            | S-4  |
| 3. $^1\text{H}$ NMR spectrum of <i>compound 2</i> (Figure S3).....                                                                               | S-5  |
| 4. $^{13}\text{C}$ NMR spectrum of <i>compound 2</i> (Figure S4).....                                                                            | S-6  |
| 5. $^1\text{H}$ NMR spectrum of <i>compound 3</i> ( <i>tri</i> -azobenzene) (Figure S5).....                                                     | S-7  |
| 6. $^{13}\text{C}$ NMR spectrum of <i>compound 3</i> ( <i>tri</i> -azobenzene) (Figure S6).....                                                  | S-8  |
| 7. Pictures of <i>tri</i> -Azo, AuNPs and <i>tri</i> -Azo@AuNPs in DMF solution and their<br>corresponding films (Figure S7).....                | S-9  |
| 8. SEM images of films (Figure S8).....                                                                                                          | S10  |
| 9. FT-IR spectra of PVA, <i>tri</i> -Azo and PVA/Azo (Figure S9).....                                                                            | S11  |
| 10. Accelerated effect of AuNPs on <i>cis</i> -to- <i>trans</i> isomerization of <i>tri</i> -Azo (Figure<br>S10).....                            | S-12 |
| 11. TEM image and UV-vis spectra of AuNPs (Figure S11).....                                                                                      | S-13 |
| 12. STEM images of films (Figure S12).....                                                                                                       | S14  |
| 13. Cycle stability of PVA/Azo@AuNPs STF sample (Figure S13).....                                                                                | S15  |
| 14. The heating temperature required for the heat release and the maximum<br>temperature difference after heat release procedure (Table S1)..... | S16  |
| 15. The volumes of AuNPs solution, PVA solution and AZO solution used for<br>preparing different films (Table S2).....                           | S17  |
| 16. Assignment of FT-IR spectra for PVA, <i>tri</i> -AZO and PVA/AZO (Table<br>S3).....                                                          | S18  |
| 17. Concentration of AuNPs (Table S4).....                                                                                                       | S-19 |
| 18. Equation of the first-order rate of <i>cis</i> -to- <i>trans</i> isomerization (Equation S1).....                                            | S-20 |

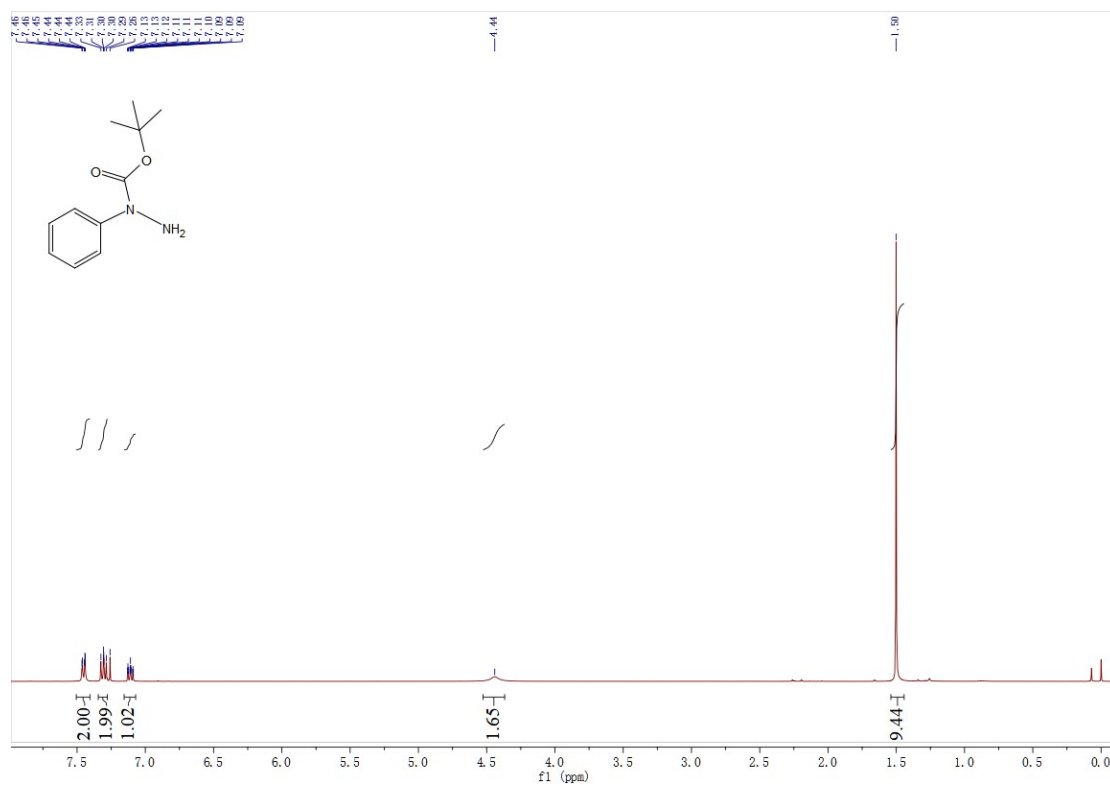

**Figure S1**  $^1\text{H}$  NMR spectrum of *tert*-butyl 1-phenylhydrazine carboxylate

$^1\text{H}$  NMR (400 MHz,  $\text{CDCl}_3$ )  $\delta$ : 7.46 (d, 2H), 7.31 (m, 2H), 7.11 (m, 1H), 6.43 (bs, 3H), 4.44 (s, 1H), 1.5 (s, 9H).

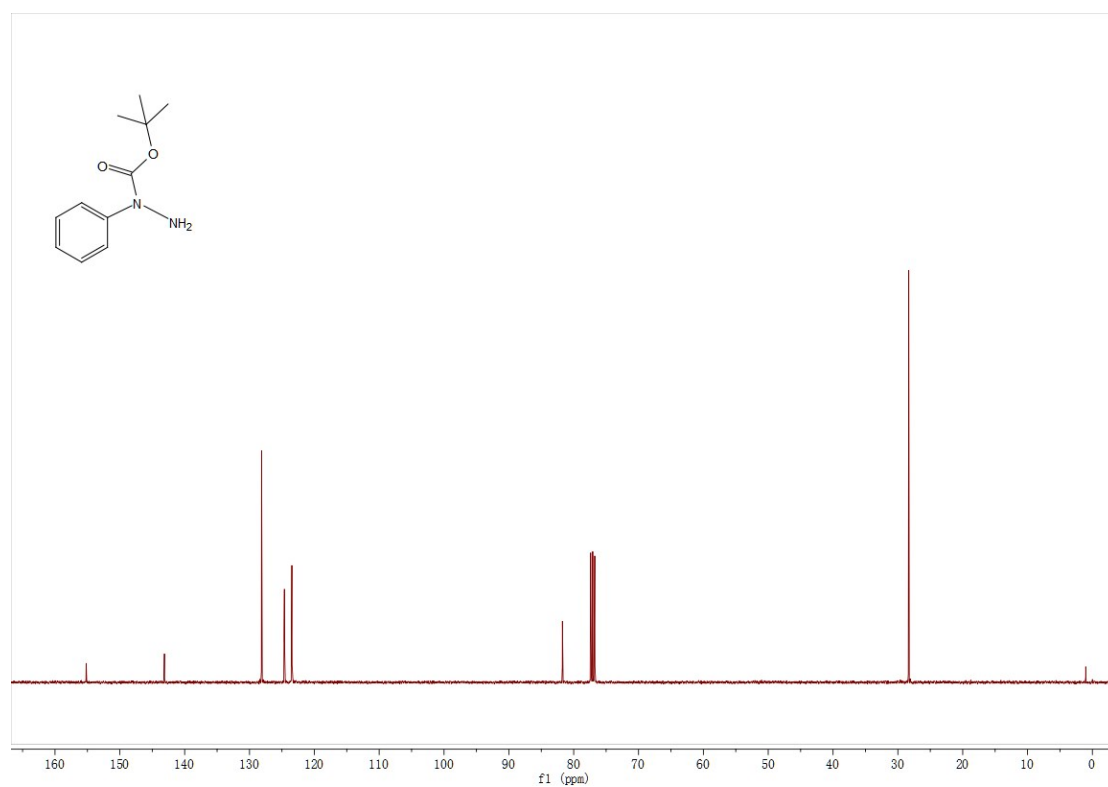

**Figure S2**  $^{13}\text{C}$  NMR spectrum of *tert*-butyl 1-phenylhydrazine carboxylate

$^{13}\text{C}$  NMR (400 MHz,  $\text{CDCl}_3$ )  $\delta$ : 155.6, 143.1, 128.1, 124.2, 123.8, 77.7, 76.9, 28.3.

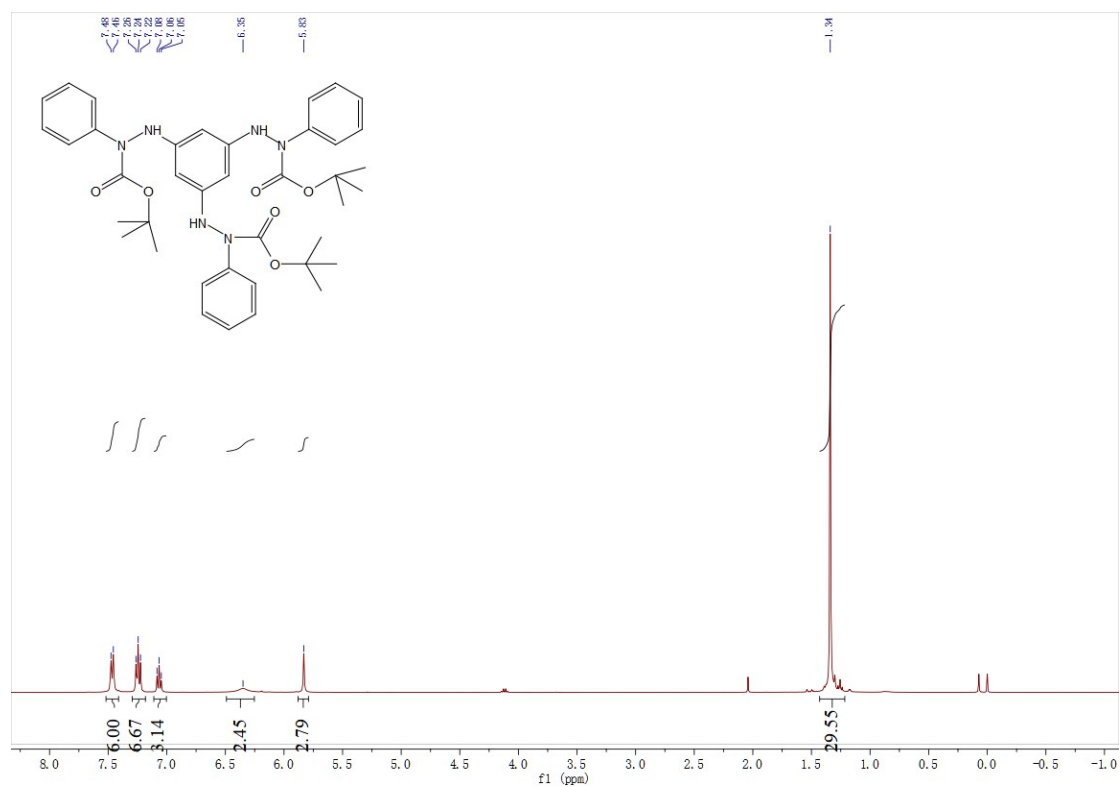

**Figure S3** <sup>1</sup>H NMR spectrum of *N'*-[3,5-Bis(*N*-*tert*-butoxycarbonyl-*N'*-phenylhydrazino)-phenyl]-*N*-phenylhydrazinecarboxylic acid *tert*-butyl ester

<sup>1</sup>H NMR (400 MHz, CDCl<sub>3</sub>)  $\delta$ : 7.43 (d, *J* = 8.4 Hz, 6H), 7.21 (dd, *J* = 8.4, 7.2 Hz, 6H), 7.03 (t, *J* = 7.2 Hz, 3H), 6.43 (bs, 3H), 5.81 (s, 3H), 1.32 (s, 27H).

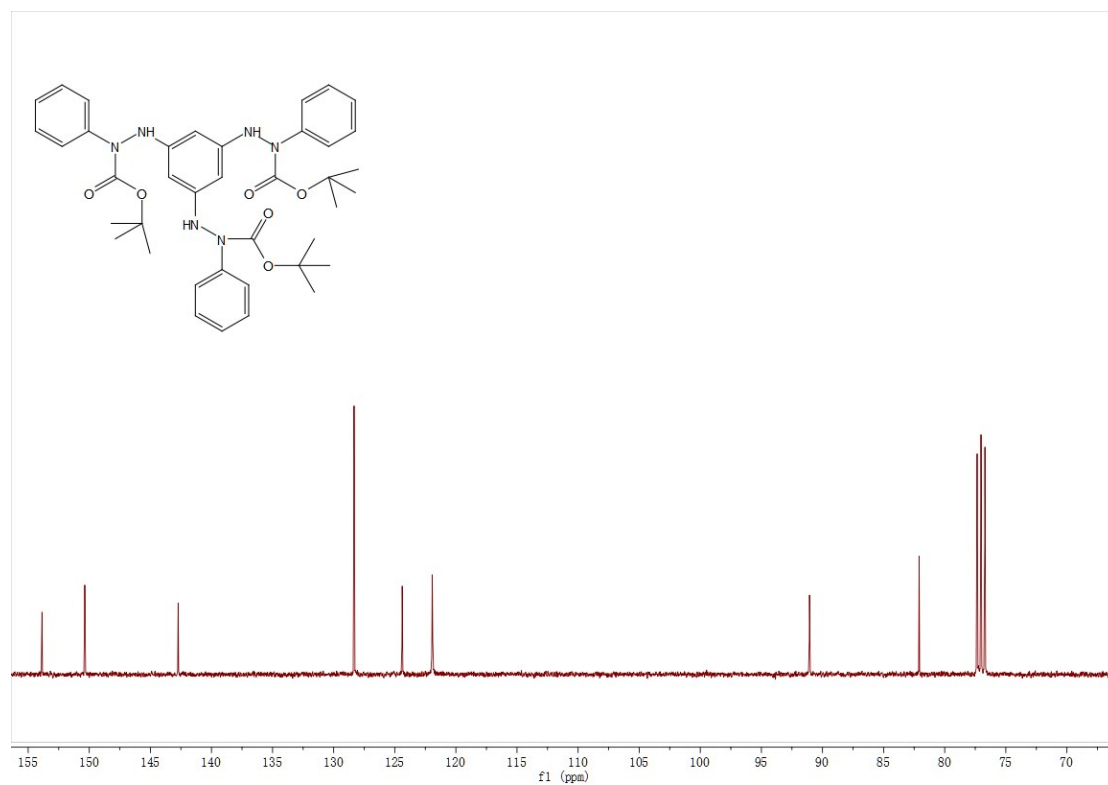

**Figure S4** <sup>13</sup>C NMR spectrum of *N'*-[3,5-Bis(*N*-*tert*-butoxycarbonyl)-*N'*-phenylhydrazino)-phenyl]-*N*-phenylhydrazinecarboxylic acid *tert*-butyl ester

<sup>13</sup>C NMR (400 MHz, CDCl<sub>3</sub>)  $\delta$ : 153.6, 150.1, 142.5, 128.1, 124.2, 121.8, 90.7, 82.0, 28.1.

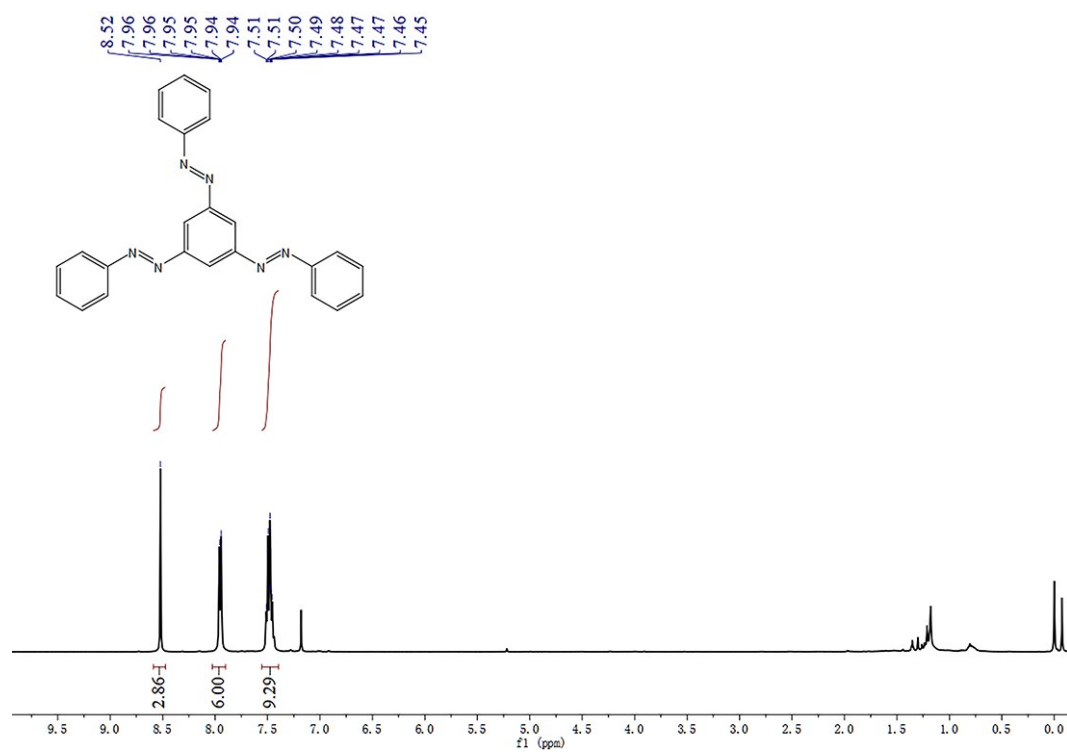

**Figure S5** <sup>1</sup>H NMR spectrum of *tris*-azobenzene

<sup>1</sup>H NMR (400 MHz, CDCl<sub>3</sub>)  $\delta$ : 8.58 (s, 3H), 8.02-7.80 (m, 6H), 7.58-7.50 (m, 9H).

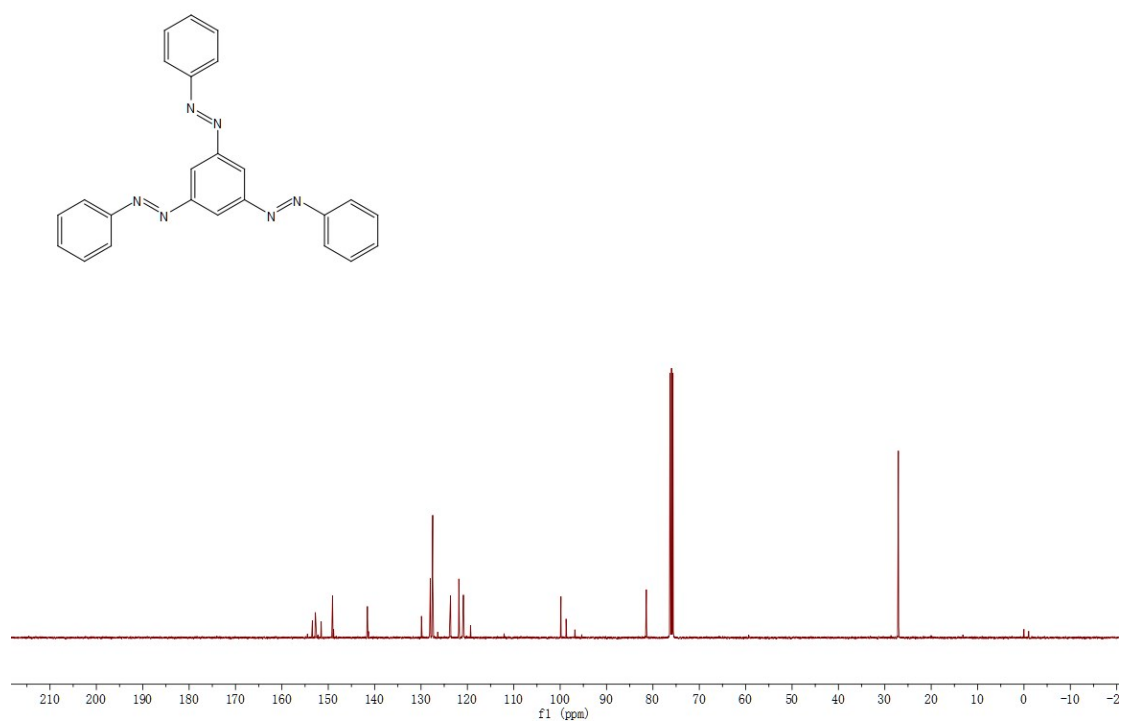

**Figure S6** <sup>13</sup>C NMR spectrum of *tris*-azobenzene

<sup>13</sup>C NMR (400 MHz, CDCl<sub>3</sub>)  $\delta$ : 153.8, 152.1, 131.6, 129.1, 124.2, 118.9.

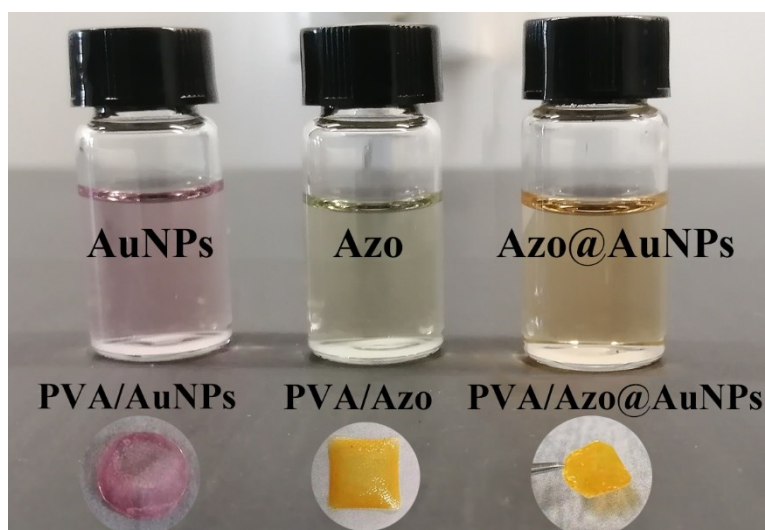

**Figure S7** Photos of AuNPs, tri-Azo and tri-Azo@AuNPs in DMF solution and corresponding PVA/AuNPs, PVA/Azo and PVA/Azo@AuNPs film.

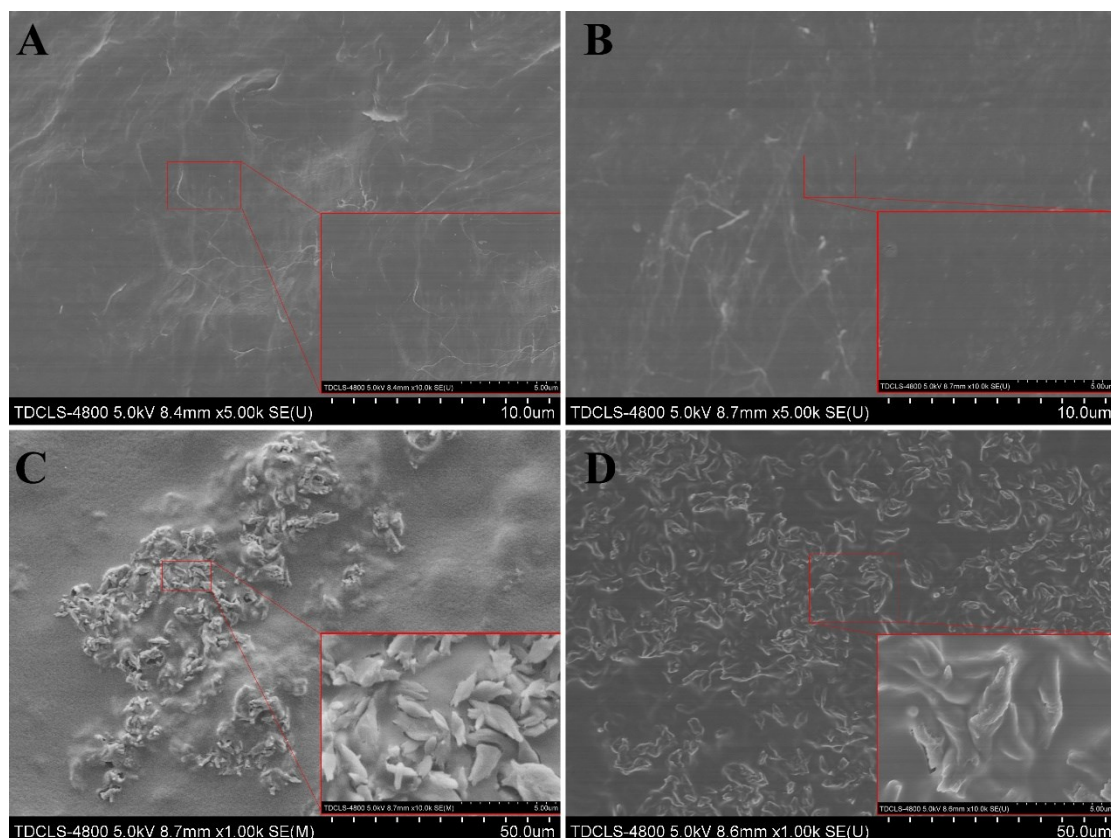

**Figure S8** SEM images of PVA (A), PVA/AuNPs (B), PVA/Azo (C), and PVA/Azo@AuNPs (D) films (A and B, magnification: 5000 $\times$ , inset: 10,000 $\times$ ; C and D, magnification: 1000 $\times$ , inset: 10,000 $\times$ ).

Microscopically, PVA and PVA/AuNPs films were flat and compact. While, irregular small flakes distributed on the surface of PVA/Azo and PVA/Azo@AuNPs films. Such protuberant small flakes structure was ascribed to Azo molecule. As can be seen from the inset of Figure S8 C and D, under the same magnification (10,000 $\times$ ), the small-flake like Azo molecule in the PVA/Azo@AuNPs film looks like more swollen than those in the PVA/Azo film. This may be because the Azo molecules in the PVA/Azo@AuNPs film were gathered around each AuNP.

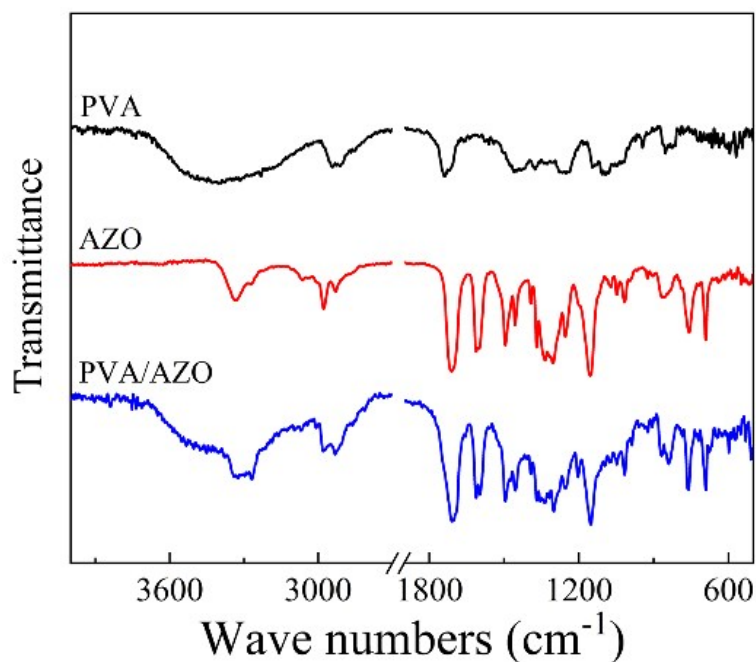

**Figure S9** The FT-IR spectra of PVA, tri-Azo and PVA/Azo.

The FT-IR spectra of PVA, *tri*-Azo, and PVA/Azo samples were measured to elucidate their structures. The obtained results were similar to those reported in previous literature.[1-5] In particular, in the functional group region, the peak at approximately 1392–1300  $\text{cm}^{-1}$  was typically attributed to the  $\text{-N=N-}$  stretching vibrations.[4-7] This peak was present in *tri*-Azo and PVA/Azo samples, indicating that the *tri*-Azo is stable and is not destroyed during the preparation process. The broad peak at 3410  $\text{cm}^{-1}$  in the PVA spectrum was attributed to the  $\text{-OH}$  stretching vibration, which can also be observed in the PVA/Azo spectrum; however, as expected, it is not observed in Azo spectrum. Moreover, the strong peaks at approximately 3300–3000  $\text{cm}^{-1}$  are attributed to the  $\text{=C-H}$  stretching vibrations of the benzene ring in the Azo spectrum. Furthermore, the peaks located at 1612 and 1494  $\text{cm}^{-1}$  are attributed to the  $\text{C=C}$  stretching vibrations of the benzene ring in the Azo spectrum. Additional details of band assignments for PVA, *tri*-Azo and PVA/Azo are listed in Table S3.

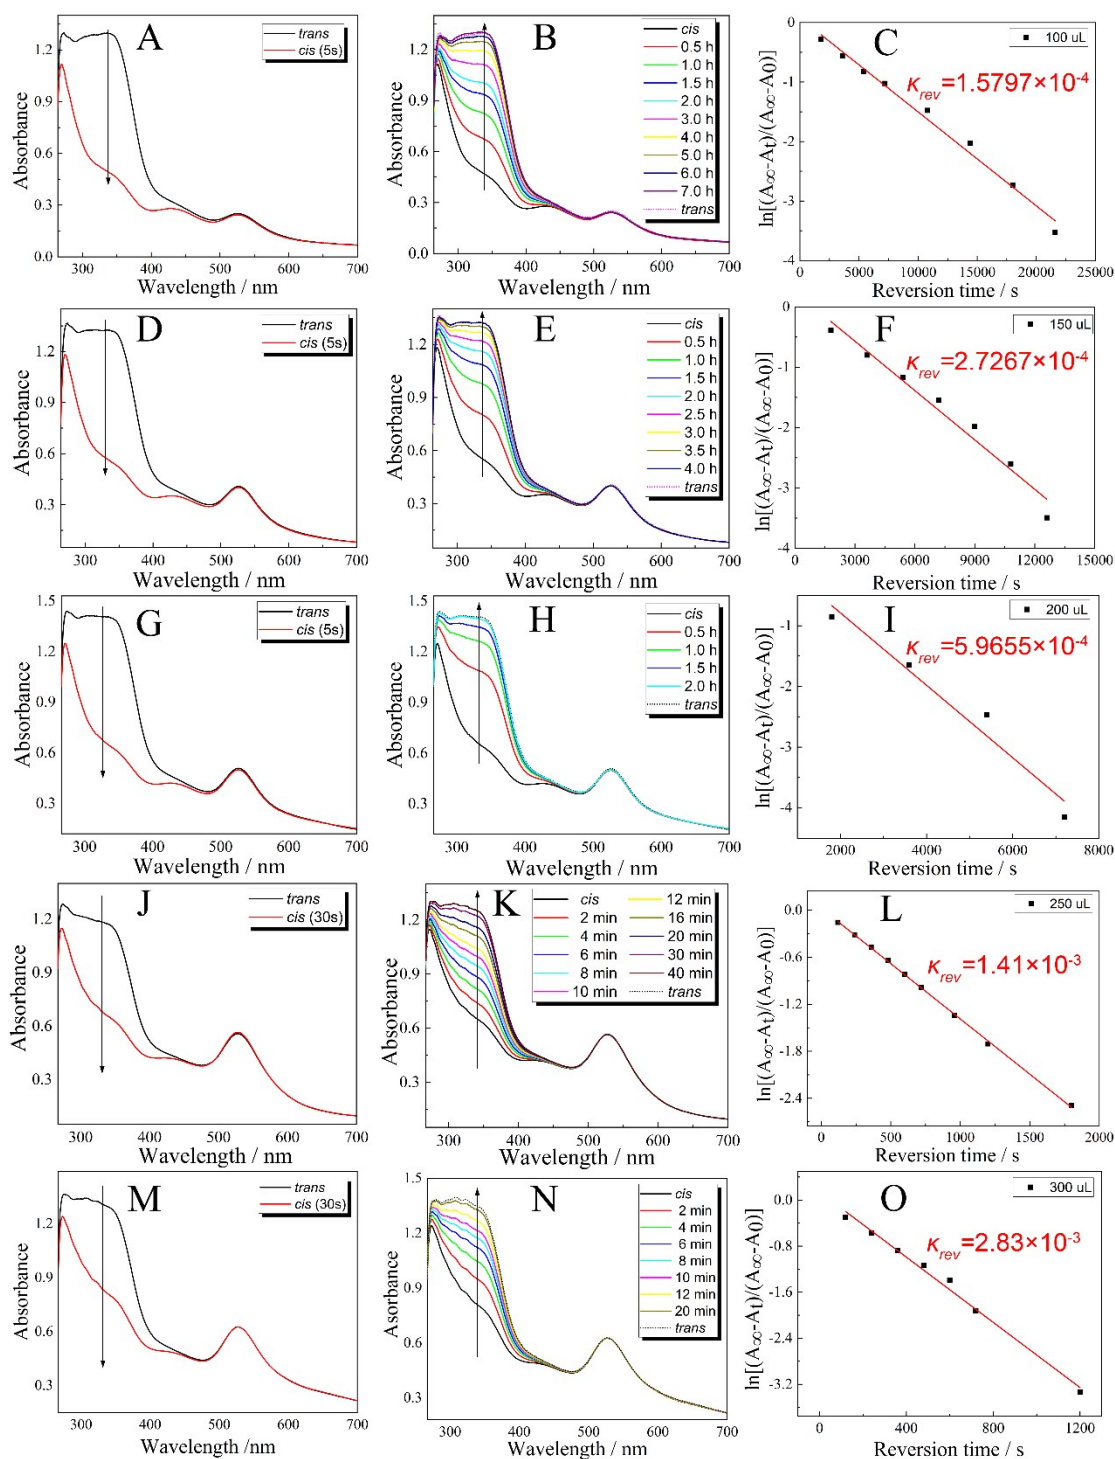

**Figure S10** Accelerated effect of AuNPs on *cis*-to-*trans* isomerization of *tri*-Azo. The time-evolved UV-visible absorption spectra of *tri*-Azo at room temperature with different AuNPs aqueous volumes of 100, 150, 200, 250 and 300 uL, respectively. First column: 365 nm UV light ( $120 \text{ mW cm}^{-2}$ ) irradiation. Second column: in darkness. Third column: the corresponding first-order rate constants for *cis*-to-*trans* ( $\kappa_{rev}$ ) transitions of the *tri*-Azo. The arrows are indicated test order.

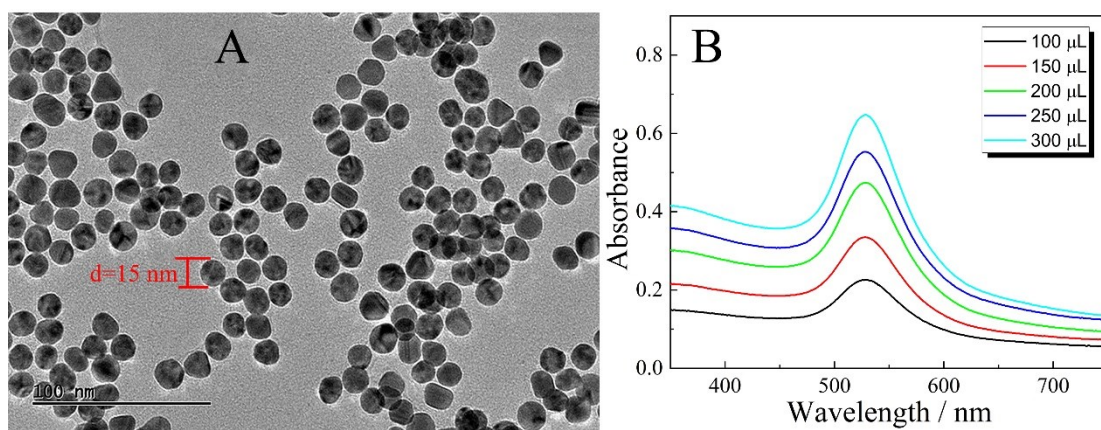

**Figure S11** (A) TEM image of AuNPs; (B) UV-vis spectra of different volumes of AuNPs.

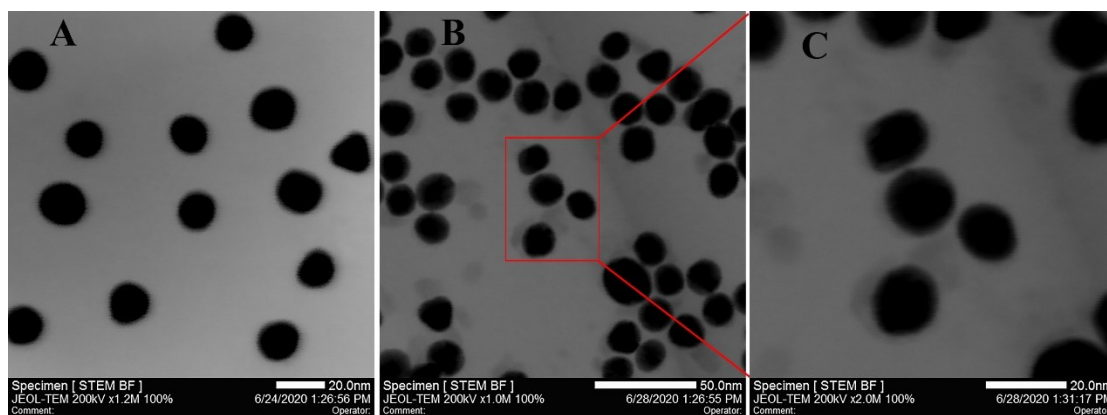

**Figure S12** STEM images of PVA/ AuNPs (A) and PVA/Azo@AuNPs (B and C) film (magnification: A is 1.2M $\times$ , B is 1.0M $\times$ , C is 2.0M $\times$ )

AuNPs in PVA/AuNPs films were round particles with sharp edges, while AuNPs in PVA/Azo/AuNPs films were round particles with shadow on its edges. The shadow represented Azo molecules, which were gathered around AuNPs.

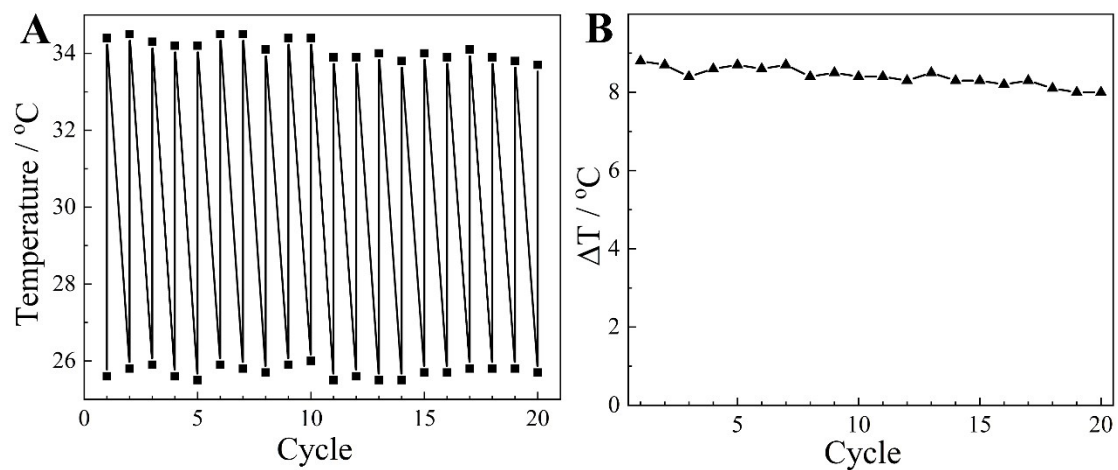

**Figure S13** Cycle stability of PVA/Azo@AuNPs STF sample. (A) is the temperature changes before and after discharge procedure of the PVA/Azo@AuNP STF sample. (B) is the temperature increases during the heat release of the sample.

**Table S1** The heating temperature required for the heat release and the maximum temperature difference after heat release procedure.

| Reported Azo-STFs            | stimulus of heat release | Max $\Delta T$ (°C) | Ref. |
|------------------------------|--------------------------|---------------------|------|
| Polymer-templated AZO        | About 100 °C             | 10                  | [8]  |
| AzoPMA                       | Heat over 100 °C         | No data             | [9]  |
| rGO-bisAzo                   | Heating to 180 °C        | 15                  | [10] |
| AZO-CNTs                     | Heating to 150 °C        | 10                  | [11] |
| <i>tri</i> -Azo/rGO          | 80 °C                    | 7.1                 | [2]  |
| Azoheteroarene               | 60 °C                    | 4.1                 | [1]  |
| Polynorbornene-templated AZO | blue light at 25 °C      | 1.5                 | [3]  |
| Fabric-templated AZO         | Heat over 60 °C          | 2                   | [12] |
|                              | Blue light               | 3-4                 |      |

**Table S2** The volumes of AuNPs solution, PVA solution and Azo solution used for preparing different films.

| The films     | solutions   |               |             |
|---------------|-------------|---------------|-------------|
|               | PVA aqueous | AuNPs aqueous | Azo in DMF  |
| PVA           | 2 mL        | 0             | 0           |
| PVA/AuNPs     | 2 mL        | 100 $\mu$ L   | 0           |
| PVA/Azo       | 2 mL        | 0             | 500 $\mu$ L |
| PVA/Azo@AuNPs | 2 mL        | 100 $\mu$ L   | 500 $\mu$ L |

**Table S3** Assignment of FT-IR spectra for PVA, *tri*-Azo and PVA/Azo.

| Band (cm <sup>-1</sup> ) |      |                  | Assignment                         |
|--------------------------|------|------------------|------------------------------------|
| Azo                      | PVA  | PVA/Azo          |                                    |
|                          | 3410 | 3402             | -OH (v)                            |
| 3330                     |      | 3267             | C-H (v)                            |
| 2979                     | 2945 | 2978             | CH <sub>2</sub> (v <sub>as</sub> ) |
| 1710, 1612, 1494         | 1737 | 1706, 1612, 1494 | -OH ( $\delta$ ) and C=C (v)       |
| 1392, 1334, 1303         |      | 1342, 1299       | -N=N- (v)                          |
| 1155                     | 1107 | 1151             | C-N (v) or C-O (v)                 |
| 758, 690                 |      | 759, 690         | =C-H ( $\gamma$ )                  |

v represents stretching vibration (v<sub>a</sub> symmetrical; v<sub>as</sub> asymmetrical),  $\gamma$  represents out-of-plane deformation vibration and  $\delta$  represents in-plane deformation vibration.

**Table S4** Concentration of AuNPs.

| volume of AuNPs aqueous (uL) | Concentration of AuNPs (mol L <sup>-1</sup> ) |
|------------------------------|-----------------------------------------------|
| 100                          | $5.83 \times 10^{-10}$                        |
| 150                          | $8.49 \times 10^{-10}$                        |
| 200                          | $1.19 \times 10^{-9}$                         |
| 250                          | $1.41 \times 10^{-9}$                         |
| 300                          | $1.64 \times 10^{-9}$                         |

### Equation S1

$$\ln \left( \frac{A_{\infty} - A_t}{A_{\infty} - A_0} \right) = -\kappa_{rev} t$$

$A_0$  is the absorption intensity of Azo and *tri*-Azo@AuNPs at metastable state (*cis*-rich) irradiated by UV light,  $A_t$  is the absorption intensity of Azo and *tri*-Azo@AuNPs reversing for " $t$ " time and  $A_{\infty}$  is the absorption intensity of Azo and *tri*-Azo@AuNPs after complete *cis-trans* reversion.

### Reference

- [1] Q. Yan, Y. Zhang, Y. Dang, Y. Feng, W. Feng, Solid-state high-power photo heat output of 4-((3,5-dimethoxyaniline)-diazenyl)-2-imidazole/graphene film for thermally controllable dual data encoding/reading, *Energy Storage Materials* 24 (2020) 662-669.
- [2] W.X. Yang, Y.Y. Feng, Q.Y. Si, Q.H. Yan, P. Long, L.Q. Dong, L.X. Fu, W. Feng, Efficient cycling utilization of solar-thermal energy for thermochromic displays with controllable heat output, *Journal of Materials Chemistry A* 7 (2019) 97-106.
- [3] L.X. Fu, J.X. Yang, L.Q. Dong, H.T. Yu, Q.H. Yan, F.L. Zhao, F. Zhai, Y.H. Xu, Y.F. Dang, W.P. Hu, Y.Y. Feng, W. Feng, Solar Thermal Storage and Room-Temperature Fast Release Using a Uniform Flexible Azobenzene-Grafted Polynorborene Film Enhanced by Stretching, *Macromolecules* 52 (2019) 4222-4231.
- [4] C.Q. Qin, Y.Y. Feng, W. Luo, C. Cao, W.P. Hu, W. Feng, A supramolecular assembly of cross-linked azobenzene/polymers for a high-performance light-driven actuator, *Journal of Materials Chemistry A* 3 (2015) 16453-16460.
- [5] C.Q. Qin, Y.Y. Feng, H.R. An, J.K. Han, C. Cao, W. Feng, Tetracarboxylated Azobenzene/Polymer Supramolecular Assemblies as High-Performance Multiresponsive Actuators, *Acs Applied Materials & Interfaces* 9 (2017) 4066-4073.
- [6] W. Luo, Y.Y. Feng, C. Cao, M. Li, E.Z. Liu, S.P. Li, C.Q. Qin, W.P. Hu, W. Feng, A high energy density azobenzene/graphene hybrid: a nano-templated platform for solar thermal storage, *Journal of Materials Chemistry A* 3 (2015) 11787-11795.
- [7] W. Luo, Y.Y. Feng, C.Q. Qin, M. Li, S.P. Li, C. Cao, P. Long, E.Z. Liu, W.P. Hu, K. Yoshino, W. Feng, High-energy, stable and recycled molecular solar thermal storage materials using AZO/graphene hybrids by optimizing hydrogen bonds, *Nanoscale* 7 (2015) 16214-16221.
- [8] D. Zhitomirsky, E. Cho, J.C. Grossman, Solid-State Solar Thermal Fuels for Heat Release Applications, *Advanced Energy Materials* 6 (2016) 1502006.
- [9] S.P. Jeong, L.A. Renna, C.J. Boyle, H.S. Kwak, E. Harder, W. Damm, D. Venkataraman, High Energy Density in Azobenzene-based Materials for Photo-Thermal Batteries via Controlled Polymer Architecture and Polymer-Solvent Interactions, *Scientific Reports* 7 (2017) 17773.
- [10] X.Z. Zhao, Y.Y. Feng, C.Q. Qin, W.X. Yang, Q.Y. Si, W. Feng, Controlling Heat

Release from a Close-Packed Bisazobenzene-Reduced-Graphene-Oxide Assembly Film for High-Energy Solid-State Photothermal Fuels, *ChemSusChem* 10 (2017) 1395-1404.

[11] Y. Jiang, J. Huang, W. Feng, X. Zhao, T. Wang, C.H. Li, W. Luo, Molecular regulation of nano-structured solid-state AZO-SWCNTs assembly film for the high-energy and short-term solar thermal storage, *Solar Energy Materials and Solar Cells* 193 (2019) 198-205.

[12] J. Hu, S. Huang, M.M. Yu, H.F. Yu, Flexible Solar Thermal Fuel Devices: Composites of Fabric and a Photoliquefiable Azobenzene Derivative, *Advanced Energy Materials* (2019) 1901363.
